# Supplementary material for: Quality of Life with Vulvar Carcinoma Treated with Palliative Electrochemotherapy: The ELECHTRA (ELEctroCHemoTherapy vulvaR cAncer) Study
Source: PubMed Central journal article supplement (PMC8036723; doi:10.3390/cancers13071622), 2021-04-01
Supplement: cancers-13-01622-s001.pdf [file cancers-13-01622-s001.pdf]

## Supplementary Materials

# Quality of Life with Vulvar Carcinoma Treated with Palliative Electrochemotherapy: the ELECHTRA (ELEctroCHemoTherapy vulvaR cAncer) Study

Anna M. Perrone, Martina Ferioli, Lisa Argnani, Francesca De Terlizzi, Cecilia Pirovano, Piero Covarelli, Giulia Dondi, Marco Tesei, Eugenia De Crescenzo, Gloria Ravegnini, Andrea Galuppi, Alessio G. Morgant and Pierandrea De Iaco

**Table S1.** Functional Assessment for Cancer-Vulva: values for the single four items.

| Group (n)                                       | Item      | Baseline  | Early Follow-Up |                      | Late Follow-Up |                      |
|-------------------------------------------------|-----------|-----------|-----------------|----------------------|----------------|----------------------|
|                                                 |           | Mean ± SD | Mean ± SD.      | p Value vs. Baseline | Mean ± SD      | p Value vs. Baseline |
| <b>Type of response</b>                         |           |           |                 |                      |                |                      |
| CR (29)                                         | BLEEDING  | 3.0 ± 1.2 | 3.7 ± 0.8       | 0.0006               | 3.5 ± 1.0      | 0.2313               |
|                                                 | BURNING   | 1.2 ± 1.0 | 2.2 ± 1.1       | 0.0037               | 2.1 ± 1.4      | 0.0298               |
|                                                 | URINATION | 2.5 ± 1.3 | 3.2 ± 0.9       | 0.0270               | 2.9 ± 1.2      | 0.2382               |
|                                                 | SITTING   | 1.8 ± 1.2 | 2.7 ± 1.1       | 0.0181               | 2.5 ± 1.4      | 0.1495               |
| PR (17)                                         | BLEEDING  | 2.6 ± 1.4 | 3.5 ± 1.0       | 0.0440               | 3.1 ± 1.3      | 0.0892               |
|                                                 | BURNING   | 1.2 ± 1.0 | 2.4 ± 1.1       | 0.0001               | 1.9 ± 1.2      | 0.0040               |
|                                                 | URINATION | 2.4 ± 1.6 | 2.9 ± 1.2       | 0.3924               | 3.0 ± 1.1      | 0.1891               |
|                                                 | SITTING   | 2.1 ± 1.6 | 2.5 ± 1.6       | 0.0960               | 2.1 ± 1.4      | 0.6364               |
| SD + PD (9)                                     | BLEEDING  | 3.2 ± 1.3 | 2.3 ± 1.5       | 0.7040               | 2.2 ± 1.6      | 0.3910               |
|                                                 | BURNING   | 0.7 ± 0.8 | 1.0 ± 1.2       | 0.2894               | 0.8 ± 1.4      | 0.0756               |
|                                                 | URINATION | 2.0 ± 1.4 | 2.1 ± 1.3       | 0.4816               | 2.4 ± 1.3      | 0.6952               |
|                                                 | SITTING   | 1.6 ± 1.3 | 1.5 ± 0.8       | 0.7358               | 1.6 ± 1.3      | 0.3632               |
| <b>Type of anatomical site of the lesion(s)</b> |           |           |                 |                      |                |                      |
| A (11)                                          | BLEEDING  | 3.4 ± 0.9 | 3.9 ± 0.3       | 0.1036               | 3.6 ± 1.0      | 0.7627               |
|                                                 | BURNING   | 1.1 ± 0.9 | 2.0 ± 1.2       | 0.0150               | 1.5 ± 1.3      | 0.3434               |
|                                                 | URINATION | 2.6 ± 1.1 | 2.9 ± 0.7       | 0.3122               | 2.9 ± 0.9      | 0.4996               |
|                                                 | SITTING   | 1.9 ± 1.4 | 2.2 ± 0.9       | 0.1950               | 1.9 ± 1.3      | 0.6926               |
| M (34)                                          | BLEEDING  | 3.0 ± 1.2 | 3.6 ± 0.8       | 0.0084               | 3.3 ± 1.2      | 0.3136               |
|                                                 | BURNING   | 1.2 ± 1.0 | 2.1 ± 1.2       | 0.0047               | 2.0 ± 1.5      | 0.0476               |
|                                                 | URINATION | 2.8 ± 1.3 | 3.1 ± 1.1       | 0.2764               | 3.1 ± 1.0      | 0.3908               |
|                                                 | SITTING   | 2.0 ± 1.2 | 2.7 ± 1.2       | 0.0559               | 2.3 ± 1.4      | 0.6579               |
| P (10)                                          | BLEEDING  | 1.9 ± 1.3 | 2.4 ± 1.7       | 0.1403               | 2.6 ± 1.6      | 0.1403               |
|                                                 | BURNING   | 0.6 ± 0.7 | 2.1 ± 1.2       | 0.0020               | 1.5 ± 0.9      | 0.0300               |
|                                                 | URINATION | 1.3 ± 1.4 | 2.2 ± 1.5       | 0.0190               | 2.2 ± 1.5      | 0.0282               |
|                                                 | SITTING   | 1.3 ± 1.5 | 1.8 ± 1.6       | 0.1403               | 2.2 ± 1.6      | 0.0382               |
| <b>Number of lesion(s)</b>                      |           |           |                 |                      |                |                      |
| Single (34)                                     | BLEEDING  | 2.8 ± 1.3 | 3.4 ± 1.2       | 0.0023               | 3.0 ± 1.4      | 0.0961               |
|                                                 | BURNING   | 1.2 ± 1.0 | 2.0 ± 1.2       | 0.0009               | 1.9 ± 1.4      | 0.0052               |
|                                                 | URINATION | 2.5 ± 1.4 | 3.1 ± 1.1       | 0.0326               | 3.0 ± 1.2      | 0.0399               |
|                                                 | SITTING   | 2.0 ± 1.5 | 2.4 ± 1.4       | 0.0665               | 2.2 ± 1.4      | 0.5285               |
| Multiple (21)                                   | BLEEDING  | 3.0 ± 1.1 | 3.6 ± 0.8       | 0.0894               | 3.4 ± 1.0      | 0.6560               |
|                                                 | BURNING   | 1.0 ± 0.8 | 2.1 ± 1.2       | 0.0014               | 1.6 ± 1.3      | 0.3343               |
|                                                 | URINATION | 2.4 ± 1.3 | 2.6 ± 1.1       | 0.2628               | 2.6 ± 1.0      | 0.5000               |
|                                                 | SITTING   | 1.7 ± 1.1 | 2.4 ± 1.2       | 0.0389               | 2.2 ± 1.4      | 0.2162               |
| <b>Size of lesion(s)</b>                        |           |           |                 |                      |                |                      |
| ≤30 mm (37)                                     | BLEEDING  | 3.2 ± 1.1 | 3.8 ± 0.7       | 0.0027               | 3.4 ± 1.2      | 0.3273               |

|                               |           |           |           |         |           |        |
|-------------------------------|-----------|-----------|-----------|---------|-----------|--------|
|                               | BURNING   | 1.2 ± 1.0 | 2.2 ± 1.2 | 0.0010  | 2.0 ± 1.4 | 0.0370 |
|                               | URINATION | 2.6 ± 1.2 | 3.2 ± 1.4 | 0.0908  | 3.1 ± 1.1 | 0.2660 |
|                               | SITTING   | 2.3 ± 1.2 | 2.7 ± 1.2 | 0.2709  | 2.4 ± 1.3 | 0.6317 |
| >30 mm (18)                   | BLEEDING  | 2.4 ± 1.4 | 2.8 ± 1.3 | 0.1104  | 2.7 ± 1.4 | 0.2410 |
|                               | BURNING   | 0.8 ± 0.7 | 1.6 ± 1.1 | 0.0013  | 1.3 ± 1.2 | 0.0821 |
|                               | URINATION | 2.1 ± 1.6 | 2.3 ± 1.2 | 0.1891  | 2.3 ± 1.1 | 0.0872 |
|                               | SITTING   | 1.0 ± 1.0 | 1.9 ± 1.2 | 0.0018  | 1.7 ± 1.4 | 0.0112 |
| <b>Whole study population</b> |           |           |           |         |           |        |
| 55                            | BLEEDING  | 2.8 ± 1.3 | 3.4 ± 1.0 | 0.0001  | 3.2 ± 1.3 | 0.0495 |
|                               | BURNING   | 1.1 ± 0.9 | 2.1 ± 1.2 | <0.0001 | 1.4 ± 1.4 | 0.0014 |
|                               | URINATION | 2.4 ± 1.3 | 2.9 ± 1.1 | 0.0130  | 2.8 ± 1.1 | 0.0399 |
|                               | SITTING   | 1.8 ± 1.3 | 2.3 ± 1.3 | 0.0036  | 2.2 ± 1.4 | 0.1457 |

A, anterior; CR, complete response; M, intermediate; P, posterior; PD, progressive disease; PR, partial response; SD, stable disease.

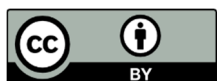

© 2021 by the authors. Licensee MDPI, Basel, Switzerland. This article is an open access article distributed under the terms and conditions of the Creative Commons Attribution (CC BY) license (<http://creativecommons.org/licenses/by/4.0/>).
